# Supplementary material for: Patient-Reported Mobility, Physical Activity, and Bicycle Use after Vulvar Carcinoma Surgery
Source: MDPI journal article supplement (doi:10.3390/cancers15082324), 2023-04-16
Supplement: s1 [file s1]

## Appendix A: GO-Bicycling questionnaire (Dutch)

Neemt u nu weer een normale week in de afgelopen maanden in gedachten. In het volgende deel van de vragenlijst willen we met u nagaan in hoeverre de vulva/huidproblemen en de behandeling effect heeft gehad op fietsen.

### Fietsen in het algemeen

- |                                       |                          |
|---------------------------------------|--------------------------|
| Ik heb geen problemen met fietsen     | <input type="checkbox"/> |
| Ik heb een beetje met fietsen         | <input type="checkbox"/> |
| Ik heb matige problemen met fietsen   | <input type="checkbox"/> |
| Ik heb ernstige problemen met fietsen | <input type="checkbox"/> |
| Ik ben niet in staat om te fietsen    | <input type="checkbox"/> |

### Kunt u aangeven in tijd en/of afstand hoever u kunt fietsen.

(getal) uren, (getal) minuten, (getal) afstand in kilometers.

### Kunt u aangeven op wat voor een soort fiets u fietst.

- |                   |                          |
|-------------------|--------------------------|
| Gewone stadsfiets | <input type="checkbox"/> |
| Elektrische fiets | <input type="checkbox"/> |
| Racefiets         | <input type="checkbox"/> |

Wij weten dat veel vrouwen verschillende klachten ervaren tijdens of na het fietsen.

### Kunt u hieronder aangeven hoe u de volgende klachten ervaart?

#### Tijdens het fietsen:

- |                                     |                                    |
|-------------------------------------|------------------------------------|
| Pijn in de zitbotjes                | (geen, een beetje, matig, ernstig) |
| Pijn in de huid van de schede/vulva | (geen, een beetje, matig, ernstig) |
| Jeuk                                | (geen, een beetje, matig, ernstig) |
| Schurend gevoel                     | (geen, een beetje, matig, ernstig) |

Andere klachten, namelijk: .....

#### Na het fietsen:

- |                                     |                                    |
|-------------------------------------|------------------------------------|
| Pijn in de zitbotjes                | (geen, een beetje, matig, ernstig) |
| Pijn in de huid van de schede/vulva | (geen, een beetje, matig, ernstig) |
| Jeuk                                | (geen, een beetje, matig, ernstig) |
| Schurend gevoel                     | (geen, een beetje, matig, ernstig) |

Andere klachten, namelijk: .....

**Wordt u door de vulva belemmert in het fietsen?**

- Nee, ik fietste voor de behandeling ook niet. ☐
- Nee, ik kan nog net zo goed fietsen als voor deze ziekte en behandeling. ☐
- Nee, door de behandeling is de belemmering verminderd of verholpen ☐
- Ja ☐

Indien ja:

**Ik zou deze activiteiten in de toekomst vaker willen doen:**

(meerdere antwoorden mogelijk)

- Fietsen tot 2 km ☐
- Korte fietstochten, 2 – 10 km ☐
- Lange fietstochten, > 10 km ☐
- Sporten op de fiets ☐

Ook zijn wij benieuwd of u bekend bent met – en gebruik maakt van – hulpmiddelen voor het fietsen, zoals een speciaal zadel, andere afstelling of andere fiets.

**Heeft u aanpassingen gedaan in het fietsen?**

- Nee ☐
- Ja, namelijk: ..... ☐

Indien nee:

**Waarom niet?**

- Ik wist niet van deze hulpmiddelen af ☐
- Ik wist dat deze hulpmiddelen bestonden, maar niet hoe ik hier aan moest komen ☐
- Ik wist dat deze hulpmiddelen bestonden, maar dit is me de moeite niet waard ☐
- Anders, namelijk: ..... ☐

Er zijn speciale fietszadels op de markt om de druk op de vulva te verminderen.

**Hoeveel zou u bereid zijn hier aan uit te geven?**

- 0 - 50€ ☐
- 50€ - 100€ ☐
- 100€ - 150€ ☐
- 150€ - 200€ ☐
- 200+€ ☐
